# Supplementary material for: Genome-Wide Analyses Reveal a Role for Peptide Hormones in Planarian Germline Development
Source: PLoS Biol. 2010 Oct 12;8(10):e1000509. doi: 10.1371/journal.pbio.1000509 (PMC2953531; doi:10.1371/journal.pbio.1000509)
Supplement: Table S3 — Peptides characterized by MS from asexual S. mediterranea . (0.13 MB PDF) [file pbio.1000509.s008.pdf]

**Table S3. Peptides Characterized by MS from Asexual *S. mediterranea***

| Prohormone Name       | Amino Acid Positions in Prohormone | Sequence                                   | Experimental Mass (Da) | Cal. Mass (Da) | Error (ppm) | PEAKS Score | LC-ESI-IT-MS/MS | LC-MALDI-TOF-MS |
|-----------------------|------------------------------------|--------------------------------------------|------------------------|----------------|-------------|-------------|-----------------|-----------------|
| 1020HH-1 <sup>Ⓢ</sup> | [29-41]                            | L.ENFDDLESNSDYM.KR                         | 1576.44                | 1577.58        | -722.6      | 51          | X               |                 |
| 1020HH-1 <sup>Ⓢ</sup> | [44-53]                            | KR.YSYLKGGIRW.KK                           | 1240.48                | 1241.66        | -950.3      | 60          | X               |                 |
| 1020HH-2              | [52-61]                            | KR.pQSYLTGGIRY.KK                          | 1139.57                | 1139.56        | 8.8         | 97          | X               |                 |
| 1020HH-2              | [52-61]                            | KR.QSYLTGGIRY.KK                           | 1156.51                | 1156.59        | -69.2       | 96          | X               |                 |
| 1020HH-2              | [53-61]                            | KRQ.SYLTGGIRY.KK                           | 1028.52                | 1028.53        | -9.7        | 99          | X               |                 |
| 1020HH-2              | [70-77]                            | KR.YLTGGIRY.#                              | 941.49                 | 941.5          | -10.6       | 99          | X               |                 |
| EYE53-1 <sup>Ⓢ</sup>  | [30-42]                            | KK.LSIPTYWDDIDTS.KR                        | 1525.45                | 1524.7         | 491.9       | 93          | X               |                 |
| EYE53-1 <sup>Ⓢ</sup>  | [49-61]                            | KR.LSVPTYFDDWESR.KKR                       | 1613.09                | 1613.74        | -402.8      | 23          | X               |                 |
| MPL-1                 | [43-49]                            | KR.AYRLMRMa.GKR                            | 938.52                 | 938.5          | 21.3        |             |                 | X               |
| MPL-1                 | [45-51]                            | KR.AVRLMRLa.GKR                            | 856.53                 | 856.54         | -11.7       | 87          | X               | X               |
| MPL-1                 | [45-52]                            | KR.AVRLMRLG.KR                             | 914.54                 | 914.55         | -10.9       | 51          | X               |                 |
| MPL-1                 | [53-60]                            | KR.AVRLMRMG.KK                             | 932.75                 | 932.51         | 257.4       | 84          | X               |                 |
| MPL-2                 | [45-51]                            | KR.AVRLMRLa.GKR                            | 856.53                 | 856.54         | -11.7       | 87          | X               | X               |
| MPL-2                 | [45-52]                            | KR.AVRLMRLG.KR                             | 914.54                 | 914.55         | -10.9       | 51          | X               |                 |
| MPL-2                 | [61-68]                            | KR.AVKLMRLG.KR <sup>§</sup>                | 886.28                 | 886.54         | -293.3      | 35          | X               |                 |
| NPP-1                 | [41-46](x3)                        | KR.ASFVRLa.GR                              | 690.39                 | 690.418        | -40.6       | 61          | X               |                 |
| NPP-1                 | [41-47](x3)                        | KR.ASFVRLG.R                               | 748.38                 | 748.42         | -53.4       | 91          | X               |                 |
| NPP-1                 | [70-81]                            | KK.SRLDYEPVDDYN.KR                         | 1484.64                | 1484.64        | 0           | 99          | X               | X               |
| NPP-2                 | [110-123]                          | KR.pQLLNSKQSIFQDEY.#                       | 1695.09                | 1694.82        | 159.3       | 94          | X               |                 |
| NPP-3                 | [56-62]                            | KR.AILLTRYa.GKR                            | 847.44                 | 847.51         | -82.6       | 94          | X               |                 |
| NPP-3                 | [56-63]                            | KR.AILLTRYG.KR                             | 905.6                  | 905.53         | 77.3        | 99          | X               |                 |
| NPP-3                 | [66-77]                            | KR.GSRRYFLNND DS.KR                        | 1442.67                | 1442.66        | 6.9         |             |                 | X               |
| NPP-3                 | [70-77]                            | RR.YFLNND DS.KR                            | 986.72                 | 986.4          | 324.4       | 58          | X               |                 |
| NPP-4                 | [25-30]                            | KR.SSVFRFG.KR                              | 798.33                 | 798.4          | -87.7       | 44          | X               |                 |
| NPP-4                 | [85-91]                            | KR.RGVAFRFa.GKR                            | 850.47                 | 850.49         | -23.5       | 99          | X               |                 |
| NPP-4                 | [85-92]                            | KR.RGVAFRFG.KR                             | 908.45                 | 908.5          | -55         | 99          | X               |                 |
| NPP-4                 | [104-109]                          | KR.QSVFRY a.G#                             | 797.44                 | 797.43         | 12.5        |             |                 | X               |
| NPP-4                 | [104-110]                          | KR.QSVFRYG.#                               | 855.47                 | 855.43         | 46.8        |             |                 | X               |
| NPP-18                | [28-42]                            | *.RNMDLDEYDSLLPKD.KR                       | 1822.8                 | 1822.84        | -21.9       | 99          | X               |                 |
| NPP-18                | [29-42]                            | *R.NMDLDEYDSLLPKD.KR                       | 1666.65                | 1666.74        | -54         | 99          | X               |                 |
| NPP-18                | [30-40]                            | *RN.MDLDEYDSLLP.KDKR <sup>§</sup>          | 1309.22                | 1309.57        | -267.3      | 41          | X               |                 |
| NPP-18                | [45-54](x2)                        | KR.GAEFFIRRVVa.GKR                         | 1191.75                | 1191.69        | 50.3        | 87          | X               |                 |
| NPP-18                | [45-55](x2)                        | KR.GAEFFIRRVVG.KR                          | 1249.71                | 1249.69        | 16          | 93          | X               |                 |
| NPP-18                | [71-77]                            | KR.NSDYLIQ.#                               | 851.26                 | 851.4          | -164.4      | 71          | X               |                 |
| NPP-22                | [26-61]                            | *.TTDDEVNENICQSLCHKSLSCLDECHDISESND SME.KR | 4044.74                | 4045.29        | -136        |             |                 | X               |
| NPP-22                | [64-69](x3)                        | KR.AKYFRLa.GKR                             | 795.46                 | 795.48         | -25.1       | 91          | X               | X               |
| NPP-22                | [64-70](x3)                        | KR.AKYFRLG.KR                              | 853.59                 | 853.48         | 128.9       | 83          | X               | X               |
| NPY-1                 | [25-37]                            | I.pEPPAKPEFFDDPE.LLR                       | 1498.65                | 1498.67        | -13.3       | 51          | X               |                 |
| NPY-1                 | [46-59]                            | KK.LNEYFAIVGRPRFG.KR                       | 1638.11                | 1637.87        | 146.5       |             |                 | X               |
| NPY-1                 | [48-57]                            | KKLN.EYFAIVGRPR.FGKR <sup>§</sup>          | 1206.94                | 1206.65        | 240.3       | 38          | X               |                 |
| NPY-1                 | [48-60]                            | KKLN.EYFAIVGRPRFGK.R                       | 1538.75                | 1538.84        | -58.5       | 47          | X               |                 |
| NPY-3                 | [26-34]                            | *.NKDELDILF.KKR                            | 1105.55                | 1105.57        | -18.1       | 99          | X               |                 |
| NPY-3                 | [70-75]                            | KR.pQKFHRD.#                               | 812.44                 | 812.4          | 49.2        |             |                 | X               |
| NPY-5 <sup>Ⓢ</sup>    | [49-62]                            | RRY.LLQMNEYLAIVARP.RYGKR                   | 1629.69                | 1629.89        | -122.7      | 37          | X               |                 |
| NPY-5 <sup>Ⓢ</sup>    | [56-65]                            | RRYLLQMNEY.LAIVARPRYG.KR                   | 1114.54                | 1114.66        | -107.7      | 45          | X               |                 |
| NPY-6                 | [22-39]                            | *.ILSTFSSDPVIDFDLEKD.K <sup>§</sup>        | 2040.73                | 2039.99        | 362.7       | 45          | X               |                 |

|        |               |                                  |         |         |        |    |   |   |
|--------|---------------|----------------------------------|---------|---------|--------|----|---|---|
| NPY-6  | [22-40]       | *.ILSTFSSDPVIDFDLEKDK.D          | 2168.1  | 2168.09 | 4.6    | 65 | X |   |
| NPY-6  | [65-78]       | KR.SLNSFQTIREFVRD.RR             | 1710.9  | 1710.87 | 17.5   | 48 | X |   |
| NYP-7  | [37-46]       | K.SRTPIAGIVN.K §                 | 1026.23 | 1026.58 | -340.9 | 30 | X |   |
| NYP-7  | [39-51]       | R.TPIAGIVNKMGGI.RK               | 1340.57 | 1340.75 | -134.3 |    |   | X |
| NYP-7  | [63-79]       | L.VYLLNEHFAIYGRPRYG.#            | 2067.1  | 2067.07 | 14.5   | 55 | X |   |
| NPY-10 | [38-64]       | KR.DLKPLFNNAKQLLWYLQKLDKMYAIAG.R | 3195.79 | 3195.81 | -6.3   |    |   | X |
| NPY-10 | [59-64]       | K.MYAIAG.R                       | 624.29  | 624.29  | 0      | 52 | X |   |
| NPY-10 | [61-68]       | KMY.AIAGRPRYa.GKR §              | 902.23  | 902.05  | 199.5  | 33 | X |   |
| PPP-1  | [22-32]       | *DF.YRVSSSDLRRF.KK               | 1384.66 | 1384.72 | -43.4  | 66 | X |   |
| PPP-1  | [35-46]       | KK.YSYYDSIGSGLL.KR               | 1336.63 | 1336.62 | 7.5    | 93 | X |   |
| PPP-1  | [49-60]       | KR.GAYYDPIGGGLL.KR               | 1194.5  | 1194.59 | -75.3  | 99 | X |   |
| PPP-1  | [50-60]       | KRG.AYYDPIGGGLL.KR               | 1137.41 | 1137.57 | -140.7 | 54 | X |   |
| PPP-1  | [63-74]       | KR.SSYYDPIGGGLL.KR               | 1240.61 | 1240.6  | 8.1    | 93 | X | X |
| PPP-1  | [77-88]       | KR.DSNYDPIGGGLL.KRR              | 1219.59 | 1219.57 | 16.4   | 68 | X |   |
| PPP-1  | [91-102](x3)  | KR.RSFYDPIGGGLL.KRR              | 1293.68 | 1293.67 | 7.7    | 94 | X | X |
| PPP-2  | [34-45]       | KR.FRYFDKIGSDLL.KR               | 1472.73 | 1472.77 | -27.2  | 93 | X | X |
| PPP-2  | [48-58]       | KR.SYFDKIGNDLL.KR                | 1283.6  | 1283.64 | -31.2  | 99 | X |   |
| PPP-2  | [61-71]       | KR.SYMDKIGSDLL.KRR               | 1240.61 | 1240.6  | 8.1    | 99 | X | X |
| SPP-1  | A [50-67]     | A.EDLGSLNADIDLDDSRLD.KK          | 1974.36 | 1974.9  | -273.4 | 85 | X |   |
|        | B [16-33]     | *.EDLGSLNADIDLDDSRLD.KK          |         |         |        |    |   |   |
|        | A [70-76](x3) | KK.AYWASRMa.GKR                  | 882.31  | 882.42  | -124.7 | 85 | X | X |
|        | B [36-42](x3) |                                  |         |         |        |    |   |   |
| SPP-1  | A [70-77](x3) | KK.AYWASRMG.KR                   | 940.48  | 940.43  | 53.2   |    |   | X |
|        | B [36-43](x3) |                                  |         |         |        |    |   |   |
| SPP-3  | [39-47]       | KR.RYSLINPRLa.GKR                | 1129.71 | 1129.67 | 35.4   | 77 | X | X |
| SPP-3  | [39-48]       | KR.RYSLINPRLG.KR                 | 1187.67 | 1187.68 | -8.4   | 81 | X |   |
| SPP-3  | [51-57]       | KR.YLINPRLa.GKR                  | 886.45  | 886.54  | -101.5 | 99 | X |   |
| SPP-3  | [51-58]       | KR.YLINPRLG.KR                   | 944.48  | 944.54  | -63.5  | 99 | X |   |
| SPP-3  | [61-70]       | KR.FQIKDIENLD.#                  | 1233.56 | 1233.62 | -48.6  | 98 | X |   |
| SPP-4  | [21-42]       | *.DYSSLNDDSELEDSYHRYPSSI.KR      | 2591.1  | 2591.09 | 3.9    | 89 | X | X |
| SPP-4  | [45-51](x2)   | KR.GLRLMRLa.GKR                  | 856.53  | 856.54  | -11.7  | 57 | X | X |
| SPP-4  | [45-52](x2)   | KR.GLRLMRLG.KR                   | 914.54  | 914.55  | -10.9  | 46 | X |   |
| SPP-4  | [55-65]       | KR.NMNDEFQFRDL.KKR               | 1427.66 | 1427.61 | 35     | 99 | X | X |
| SPP-5  | [44-50]       | KR.GLRLRMa.GKR                   | 856.54  | 856.53  | 11.7   | 73 | X |   |
| SPP-5  | [44-51]       | KR.GLRLRMG.KR                    | 914.55  | 914.55  | 0      | 70 | X |   |
| SPP-5  | [54-61]       | KR.NDLFRLLD.KR                   | 1004.5  | 1004.53 | -29.9  | 99 | X |   |
| SPP-6  | [29-39]       | KR.IPGIGFNRFa.IYKR               | 1204.61 | 1204.64 | -24.9  | 90 | X |   |
| SPP-6  | [29-41]       | KR.IPGIGFNRFa.IY.KR              | 1480.73 | 1480.78 | -33.8  | 91 | X | X |
| SPP-6  | [49-62]       | KR.LIDPMTFGYGFSNL.K#             | 1573.7  | 1573.75 | -31.8  | 98 | X | X |
| SPP-7  | [26-38]       | KR.TVGFGFNRLHLY.KR               | 1536.7  | 1536.78 | -52.1  | 99 | X | X |
| SPP-7  | [46-59]       | KR.LIDPMTFGSGFANL.K#             | 1481.67 | 1481.72 | -33.7  | 99 | X |   |
| SPP-8  | [26-38]       | KR.TMGFGFNRMMLLY.KR              | 1562.6  | 1562.74 | -89.6  | 81 | X | X |
| SPP-8  | [46-59]       | KR.LIDPMTFGSGFANL.R#             | 1481.67 | 1481.72 | -33.7  | 99 | X |   |
| SPP-9  | [18-22]       | *LAN.VCCGV.QKR                   | 479.22  | 479.19  | 62.6   | 59 | X |   |
| SPP-9  | [18-23]       | *LAN.VCCGVQ.KR                   | 607.21  | 607.25  | -65.9  | 42 | X | X |
| SPP-9  | [26-36]       | KR.SLPYNPEYELY.KR                | 1386.61 | 1386.63 | -14.4  | 96 | X |   |
| SPP-9  | [44-57]       | KR.LIDPLTFGSGFSNL.#              | 1479.62 | 1479.76 | -94.6  | 99 | X | X |
| SPP-10 | [55-64]       | KR.GAEFFLRRVVa.GKR               | 1191.61 | 1191.69 | -67.1  | 70 | X |   |

|                |                    |                                   |                |                |               |           |          |          |
|----------------|--------------------|-----------------------------------|----------------|----------------|---------------|-----------|----------|----------|
| SPP-10         | [55-65]            | KR.GAEFFLRRVVG.KR                 | 1249.65        | 1249.69        | -32           | 93        | X        |          |
| <i>SPP-10</i>  | <i>[69-78]</i>     | <i>KRS.TKPIDPNQYP.LVYGE#</i>      | <i>1171.02</i> | <i>1171.59</i> | <i>-486.5</i> | <i>66</i> | <i>X</i> |          |
| SPP-11         | [24-28]            | KR.YIRFG.KR                       | 654.46         | 654.35         | 168.1         |           |          | X        |
| SPP-11         | [31-37]            | KR.HQQLFPN.KR                     | 882.34         | 882.43         | -102          | 85        | X        | X        |
| <u>SPP-11</u>  | <u>[55-71]</u>     | <u>KR.NDLLDSEFLNDNMNENLE.KR</u>   | <u>2023.97</u> | <u>2023.87</u> | <u>49.4</u>   | <u>99</u> | <u>X</u> |          |
| SPP-12         | [40-54]            | KR.NYMDFFGLNGDMQRF.KK             | 1853.61        | 1853.79        | -97.1         | 99        | X        | X        |
| <b>SPP-13</b>  | <b>[60-64](x2)</b> | <b>KK.FRGLLa.GKR</b>              | <b>603.45</b>  | <b>603.37</b>  | <b>132.6</b>  | <b>84</b> | <b>X</b> | <b>X</b> |
| SPP-15         | [48-53](x8)        | KR.FDPIQFa.GKR                    | 764.35         | 764.39         | -52.3         | 62        | X        |          |
| SPP-15         | [48-54](x8)        | KR.FDPIQFG.KR                     | 822.42         | 822.4          | 24.3          |           |          | X        |
| SPP-15         | [120-125]          | KR.FDPIMFa.GR#                    | 767.4          | 767.37         | 39.1          |           |          | X        |
| SPP-16         | [32-45]            | KR.pQFDPIMYGKLRQFY.RR             | 1787.69        | 1787.87        | -100.7        | 89        | X        |          |
| <i>SPP-16</i>  | <i>[33-38]</i>     | <i>KRQ.FDPIMYa.GK<sup>§</sup></i> | <i>783.32</i>  | <i>783.35</i>  | <i>-38.3</i>  | <i>27</i> | <i>X</i> |          |
| <i>SPP-16</i>  | <i>[70-76]</i>     | <i>KR.pQFDPIMY.KR</i>             | <i>895.23</i>  | <i>895.38</i>  | <i>-167.5</i> | <i>84</i> | <i>X</i> |          |
| SPP-16         | [70-76]            | KR.QFDPIMY.KR                     | 912.49         | 912.41         | 87.7          |           |          | X        |
| SPP-16         | [79-91]            | KR.pQSNPYFLSDIRSI.KR              | 1521.67        | 1521.75        | -52.6         | 99        | X        | X        |
| SPP-16         | [79-91]            | KR.QSNPYFLSDIRSI.KR               | 1538.7         | 1538.7         | 0             | 83        | X        | X        |
| <i>SPP-16</i>  | <i>[80-91]</i>     | <i>KRQ.SNPYFLSDIRSI.KR</i>        | <i>1410.55</i> | <i>1410.71</i> | <i>-113.4</i> | <i>98</i> | <i>X</i> |          |
| SPP-17         | [51-64]            | KK.IIDPMTYGTGFSNL.#               | 1527.6174      | 1527.73        | -73.7         | 72        | X        |          |
| SPP -18        | [29-35]            | KR.GYHFFRL.KK                     | 938.45         | 938.48         | -32           | 96        | X        | X        |
| <u>SPP -19</u> | <u>[30-39]</u>     | <u>KR.KHIGHQIFRL.KR</u>           | <u>1247.77</u> | <u>1247.73</u> | <u>32.1</u>   | <u>73</u> | <u>X</u> |          |
| <u>SPP -19</u> | <u>[34-39]</u>     | <u>G.HQIFRL.KR</u>                | <u>812.39</u>  | <u>812.47</u>  | <u>-98.5</u>  | <u>30</u> | <u>X</u> |          |
| SPP -19        | [42-48]            | KR.GYHFFRL.RK                     | 938.45         | 938.48         | -32           | 96        | X        | X        |

<sup>a</sup> Period (.) indicates a cleavage site. Asterisk (\*) indicates the presence of signal peptide before the sequence. Pound (#)

indicates the end of a precursor sequence. (x number) indicates the number of repeated sequences in this prohormone. “X”

indicates the instrument used to identify the peptide. Putative PTMs include N-terminal pyroglutamination (“p”) and C-terminal amidation (“a”). **Bold** type indicates prohormone precursors characterized only in asexual animals by mass spectrometry.

Underlined peptides are only detected in asexual animals, while the peptides in *italic* are identified as different forms (such as modified by PTM, etc.) compared to the ones in sexual animals. In addition, peptides detected with lower confidence are marked as §. Three prohormones labeled with ϕ are tentative and not confirmed, since they do not meet the criteria for prohormone identification as described in experimental section.
